# Supplementary material for: Long Noncoding RNA HOTTIP Serves as an Independent Predictive Biomarker for the Prognosis of Patients with Clear Cell Renal Cell Carcinoma
Source: PubMed Central journal article supplement (PMC7255047; doi:10.1155/2020/4301634), 2020-05-14
Supplement: 4301634.f1.pdf [file 4301634.f1.pdf]

Supplementary Table 1: Result of sensitivity analysis in OS group

| Study omitted            | Estimate  | [95% Confidence Interval] |
|--------------------------|-----------|---------------------------|
| Wang, et al. (2015)      | 2.3150864 | 1.9248102 - 2.7844951     |
| Ge, et al. (2015)        | 2.3608572 | 1.9693037 - 2.8302629     |
| Li, et al. (2015)        | 2.3119111 | 1.9284929 - 2.7715597     |
| Zhang, et al. (2015)     | 2.3645585 | 1.9602613 - 2.8522403     |
| Quagliata, et al. (2014) | 2.3795094 | 1.9853954 - 2.8518577     |
| Ren, et al. (2015)       | 2.3663821 | 1.955989 - 2.8628812      |
| Ye, et al. (2016)        | 2.3301847 | 1.9402601 - 2.7984705     |
| Yang, et al. (2016)      | 2.3106437 | 1.9340111 - 2.7606223     |
| Sun, et al. (2017)       | 2.2798145 | 1.9027573 - 2.7315907     |
| Navarro, et al. (2019)   | 2.3372765 | 1.9491453 - 2.8026958     |
| Zhao, et al. (2018)      | 2.363549  | 1.9653141 - 2.8424788     |
| Wu, et al. (2018)        | 2.4807923 | 2.0442615 - 3.0105395     |
| Zou, et al. (2018)       | 2.3133554 | 1.9304669 - 2.7721863     |
| Lee, et al. (2019)       | 2.2883053 | 1.9146935 - 2.7348197     |
| Balcin, et al. (2018)    | 2.2674465 | 1.885883 - 2.7262106      |
| Combined                 | 2.3359258 | 1.9568589 - 2.7884225     |
